# Supplementary material
Source: publisher figshare collection journal article supplement (https://frontiersin.figshare.com/ndownloader/files/22737740)
Supplement: Supplementary file [file 22737740]

## Accession Numbers

Amino acid sequences used for phylogenetic analysis can be found in the GenBank database under the following accession numbers: CYP716A52v2 (AFO63032); CYP716A83 (AOG74832); CYP716AL1 (AEX07773); **IaAO1** (QHB93527); CYP716A75 (AHF22088); CYP716A265 (AZS32332); CYP716A12 (ABC59076); CYP716A266 (AZS32333); CYP716A15 (F6H9N6); CYP716A17 (BAJ84107); CYP716A14v2 (AHF22083); CYP716A1 (AED94045); CYP716A2 (AED94048); CYP716Y1 (AHF45909); CYP87D16 (AHF22090); CYP88D6 (QBC36431); CYP51H10 (ABG88965); CYP93E5 (AIN25417); CYP93E6 (AIN25418); CYP93E7 (AIN25419); CYP93E8 (AIN25420); CYP93E2 (ABC59085); CYP93E3 (BAG68930); CYP93E4 (AIN25416); CYP93E1 (BAE94181); CYP93E9 (AIN25421); CYP72A68v2 (BAL45204); CYP72A61v2 (BAL45199); CYP72A154 (BAL45207); CYP72A63 (CYP72A63); CYP106A1 (ADF38708); UGT73F4 (BAM29363); UGT73F2 (BAM29362); UGT73F3 (ACT34898); UGT73P2 (BAI99584); UGT73P12 (BBN60804); GuUGAT (ANJ03631); UGT73AD1 (ALD84259); UGT73AH1 (AUR26623); UGT73C12 (AFN26668); UGT73C13 (AFN26669); UGT73C10 (AFN26666); UGT73C11 (AFN26667); UGTPg100 (AKQ76388); UGT91H4 (BAI99585); UGTPg29 (AKA44579); UGT74AC1 (AEM42999); **IaAU1** (QHB93528); UGT74M1 (ABK76266); UGT74AE2 (AGR44631); UGTPg45 (AKA44586); Bs-Yjic (NP\_389104).

**TABLE S1** Primers used in this study

| Primer ID   | (Primer sequence) 5'→3'                                                                             | Remarks                                                                                                                         |
|-------------|-----------------------------------------------------------------------------------------------------|---------------------------------------------------------------------------------------------------------------------------------|
| IaAO1-F     | CATGGAGTTCTTCTATGTCT                                                                                | Amplification of <i>IaAO1</i>                                                                                                   |
| IaAO1-R     | TTAAGCTGCTGCTTTGTGCGG                                                                               |                                                                                                                                 |
| IaAU1-F     | ATGGAGAAAGAAAAAGCTTGCA                                                                              | Amplification of <i>IaAU1</i>                                                                                                   |
| IaAU1-R     | TCAGTTGGCCACAAGCCG                                                                                  |                                                                                                                                 |
| pTIaAO1-F   | <u>TTGAAAATTCGAATTC</u> ATGGAGTTCTTCTATGTCTCTCTCCTCTCTCTCTTCG                                       | Amplification of <i>IaAO1</i> for ligation into pESC-TRP                                                                        |
| pTIaAO1-R   | <u>GAATTGTTAATTAAGAGCTCTTA</u> <i>ATGATGATGATGATGATG</i> AGCTGCTGCTTTGTGCGG                         |                                                                                                                                 |
| pETIaAU1-F  | <u>GCCATGGCTGATATCAT</u> GAGAGAAAGAAAAAGCTTGCAAAGC                                                  | Amplification of <i>IaAU1</i> for ligation into pET32a(+)                                                                       |
| pETIaAU1-R  | <u>TTGTGACGAGCTCTC</u> AGTTGGCCACAAGCCGAGC                                                          |                                                                                                                                 |
| pUIaAU1-F   | <u>TTGAAAATTCGAATTC</u> ATGGAGAAAGAAAAAGCTTGCAAAGC                                                  | Amplification of <i>IaAU1</i> for ligation into pESC-URA                                                                        |
| pUIaAU1-R   | <u>GAATTGTTAATTAAGAGCTCTC</u> AGTTGGCCACAAGCCGAGC                                                   |                                                                                                                                 |
| GPDlaAO1-F  | <u>TAGAACTAGTGGATCC</u> ATGGAGTTCTTCTATGTCTCTCTCTCT                                                 | Amplification of <i>IaAO1</i> for ligation into p426GDP                                                                         |
| GPDlaAO1-R  | <u>AATTACATGACTCGAGTTA</u> AGCTGCTGCTTTGTGCGGA                                                      |                                                                                                                                 |
| GPDlaAU1-F  | <u>CGGATTCTAGAACTAGTGGATCC</u> ATGGAAAAGGAAAAGGCATGCAAAG                                            | Amplification of <i>IaAU1</i> for ligation into p426GDP                                                                         |
| GPDlaAU1-R  | <u>CATAACTAATTACATGACTCGAGTTA</u> ATTTGCTACCAATCTGGCAACGATTTTCAT                                    |                                                                                                                                 |
| ADE2-GAP-F  | <u>CATCCTACTATAACAATCAAGAAAAACAAGAAAATCGGACAAAACAATCAAGTGGGAAC</u><br>AAAAGCTGGAGCTCAGTTT           | Amplification of <i>P<sub>GPD</sub>-IaAO1-T<sub>CYC1</sub></i> expression cassette for insertion into ADE2 site of yeast genome |
| ADE2-CYC1-R | <u>GTATATCATTTTATAATTATTTGCTGTACAAGTATATCAATAAACTTATATAGGCCGCAAA</u><br>TTAAAGCCTTCGAGCGTCC         |                                                                                                                                 |
| BTS1-GAP-F  | <u>GAGGAGAGAAGGCTTTATTTCTGACTATCTTCCTCCACTAATTTGATTGATCAATTTATTTTC</u><br>ATTATCAATACTCGCCATTTCAAAG | Amplification of <i>P<sub>GPD</sub>-IaAU1-T<sub>CYC1</sub></i> expression cassette for insertion into BTS1 site of yeast genome |
| BTS1-CYC1-R | <u>TCATTTTCAAAGAAGCTACTAATAGAAAGAGAACAAAGCGTTTACGAGTCTGGAAAATCA</u><br>GCAAATTAAAGCCTTCGAGC         |                                                                                                                                 |

Note: “      ” stands for homology extent of each end at insert site. The italicized parts indicate 6×HIS tags.

**TABLE S2** Plasmids and strains used in this study

| Plasmid or strain                   | Description or relevant genotype                                                                                                                                                                                                            | Source or reference                      |
|-------------------------------------|---------------------------------------------------------------------------------------------------------------------------------------------------------------------------------------------------------------------------------------------|------------------------------------------|
| <b>Plasmids</b>                     |                                                                                                                                                                                                                                             |                                          |
| <i>pEASY-T5</i>                     | Cloning vector with a T7 promoter, Amp <sup>r</sup> , Kan <sup>r</sup>                                                                                                                                                                      | TransGen Biotech                         |
| pET-32a(+)                          | Bacterial vector for expressing fusion proteins with His-, Trx- and S-tag, Amp <sup>r</sup>                                                                                                                                                 | Novagen                                  |
| pESC-TRP                            | Galactose-regulated yeast expression vector with a TRP1 selectable marker, Amp <sup>r</sup>                                                                                                                                                 | Lab stock                                |
| pESC-URA                            | Galactose-regulated yeast expression vector with a URA3 selectable marker, Amp <sup>r</sup>                                                                                                                                                 | Lab stock                                |
| p426GPD                             | Yeast expression vector with a GAP promoter, Amp <sup>r</sup>                                                                                                                                                                               | ATCC                                     |
| Cas9-NAT                            | The vector with a natMX6 yeast selectable marker for expressing Cas9 protein, Amp <sup>r</sup>                                                                                                                                              | Addgene                                  |
| pRS42H-gRNA- <i>ade2</i>            | The vector carrying <i>ade2</i> guide RNA of <i>S. cerevisiae</i>                                                                                                                                                                           | Constructed by Yun                       |
| pRS42H-gRNA- <i>bts1</i>            | The vector carrying <i>bts1</i> guide RNA of <i>S. cerevisiae</i>                                                                                                                                                                           | (unpublished data)                       |
| <i>pT5-IaAO1</i>                    | Coding region of <i>IaAO1</i> cloned into <i>pEASY-T5</i> , Amp <sup>r</sup> , Kan <sup>r</sup>                                                                                                                                             | This study                               |
| <i>pT5-IaAU1</i>                    | Coding region of <i>IaAU1</i> cloned into <i>pEASY-T5</i> , Amp <sup>r</sup> , Kan <sup>r</sup>                                                                                                                                             | This study                               |
| pET- <i>IaAU1</i>                   | Coding region of <i>IaAU1</i> cloned into the <i>EcoR</i> V- <i>Sac</i> I sites of pET-32a(+), Amp <sup>r</sup>                                                                                                                             | This study                               |
| pT- <i>IaAO1</i>                    | Coding region of <i>IaAO1</i> cloned into the <i>EcoR</i> I- <i>Spe</i> I sites of pESC-TRP, Amp <sup>r</sup>                                                                                                                               | This study                               |
| pU- <i>IaAU1</i>                    | Coding region of <i>IaAU1</i> cloned into the <i>EcoR</i> I- <i>Sac</i> I sites of pESC-URA, Amp <sup>r</sup>                                                                                                                               | This study                               |
| GPD- <i>IaAO1</i>                   | Coding region of <i>IaAO1</i> cloned into the <i>BamH</i> I- <i>Xho</i> I sites of Ip426GPD, Amp <sup>r</sup>                                                                                                                               | This study                               |
| GPD- <i>IaAU1</i>                   | Coding region of <i>IaAU1</i> cloned into the <i>BamH</i> I- <i>Xho</i> I sites of p426GPD, Amp <sup>r</sup>                                                                                                                                | This study                               |
| <b>Strains</b>                      |                                                                                                                                                                                                                                             |                                          |
| <b><i>E. coli</i> strains</b>       |                                                                                                                                                                                                                                             |                                          |
| <i>Trans1-T1</i>                    | F <sup>-</sup> $\phi 80(lacZ)\Delta M15\Delta lacX74hsdR(r_k^-, m_k^+)\Delta recA1398endA1tonA$                                                                                                                                             | TransGen Biotech                         |
| <i>Transetta</i> (DE3)              | F <sup>-</sup> <i>ompT hsdS<sub>B</sub>(r<sub>B</sub><sup>-</sup> m<sub>B</sub><sup>-</sup>)gal dcm lacY1</i> (DE3)pRARE(argU, argW, ileX, glyT, leuW, proL)(Cam <sup>r</sup> )                                                             | TransGen Biotech                         |
| <b><i>S. cerevisiae</i> strains</b> |                                                                                                                                                                                                                                             |                                          |
| WAT11tfAX                           | WAT11 <sup>*</sup> , <i>trp1::P<sub>GAP1</sub>-SctHMGR1-T<sub>CYC1</sub>, ura3::P<sub>GAP1</sub>-ScERG20-T<sub>CYC1</sub>, leu2::P<sub>GAP1</sub>-SeACS<sup>L64IP</sup>-T<sub>CYC1</sub>, his3::P<sub>TEF1</sub>-IaAS1-T<sub>CYC1</sub></i> | Constructed by Yun<br>(unpublished data) |
| WAT11tfAX-pT <i>IaAO1</i>           | WAT11tfAX carrying pT <i>IaAO1</i> plasmid                                                                                                                                                                                                  | This study                               |
| WAT11tfAX-pT                        | WAT11tfAX carrying pESC-TRP plasmid                                                                                                                                                                                                         | This study                               |
| WAT11tfAX-pT-pU                     | WAT11tfAX carrying both pESC-TRP and pESC-URA plasmids                                                                                                                                                                                      | This study                               |
| WAT11S1                             | WAT11tfAX carrying both pT <i>IaAO1</i> and pU- <i>IaAU1</i> plasmids                                                                                                                                                                       | This study                               |
| WAT11tfAX-Cas9                      | WAT11tfAX carrying Cas-NAT plasmid for construction of WAT11S2                                                                                                                                                                              | This study                               |
| WAT11S2                             | WAT11tfAX, <i>ade2::P<sub>GAP</sub>-IaAO1-T<sub>CYC1</sub>, bts1::P<sub>GAP</sub>-IaAU1-T<sub>CYC1</sub></i>                                                                                                                                | This study                               |

\*Urban P, Mignotte C, Kazmaier M, Delorme F, Pompon D. 1997. Cloning, yeast expression, and characterization of the coupling of two distantly related *Arabidopsis thaliana* NADPH-cytochrome P450 reductases with P450 CYP73A5\*. Journal of Biological Chemistry. 272(31);19176-19186. doi: 10.1074/jbc.272.31.19176

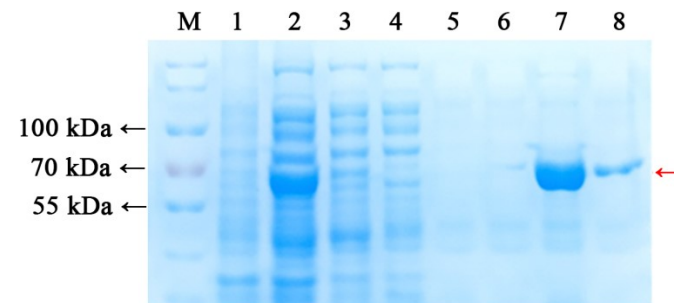

**FIGURE S1** Expression and purification of recombinant protein IaAU1. M, molecular mass standard; 1, total protein before induction; 2, total protein after induction; 3, soluble protein; 4, flow-through; 5-8, purified IaAU1.

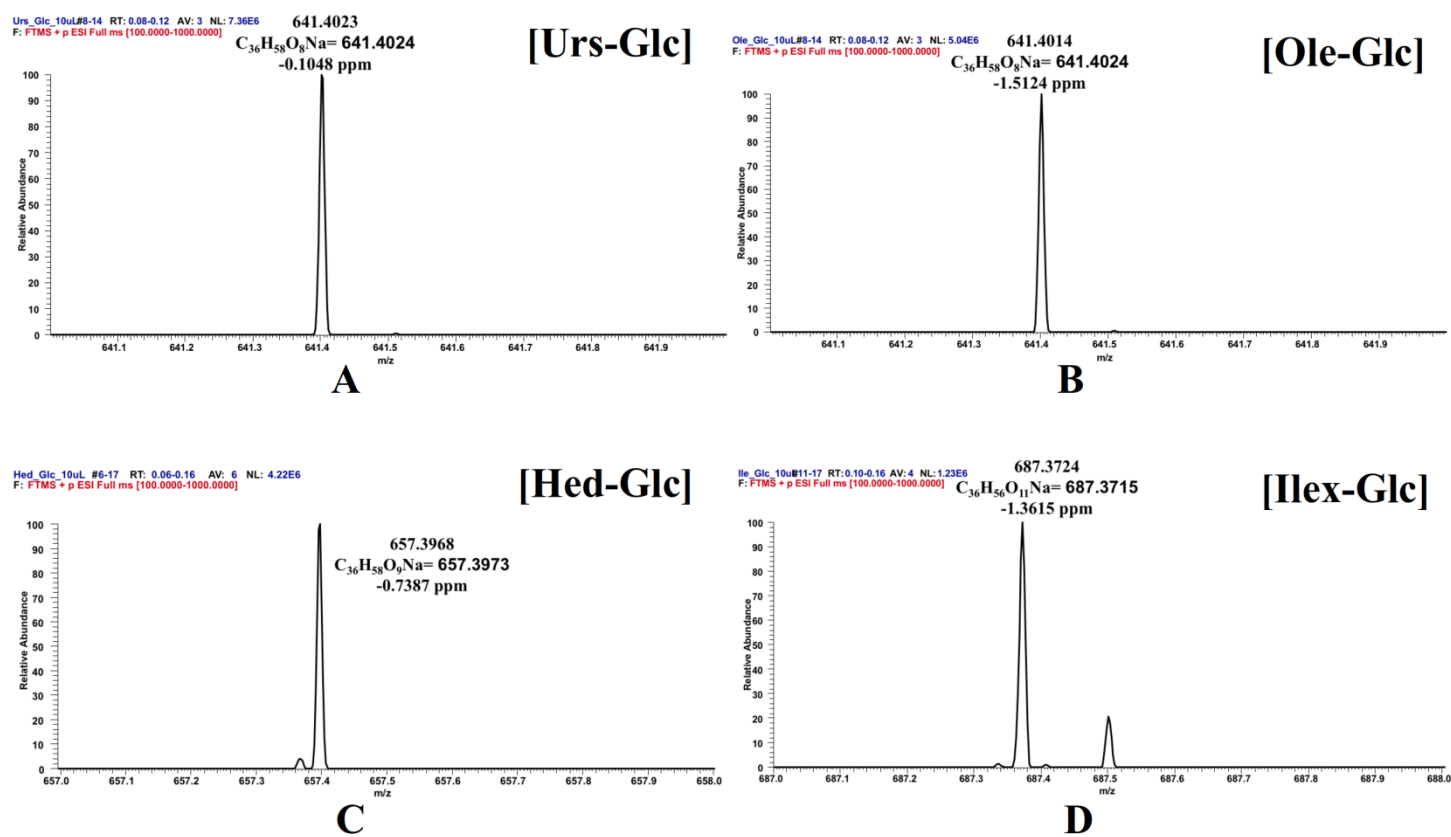

**FIGURE S2** Mass to charge ratio of IaAU1 assay product of (A) ursolic acid; (B) oleanolic acid; (C) hederagenin; (D) ilexgenin A.

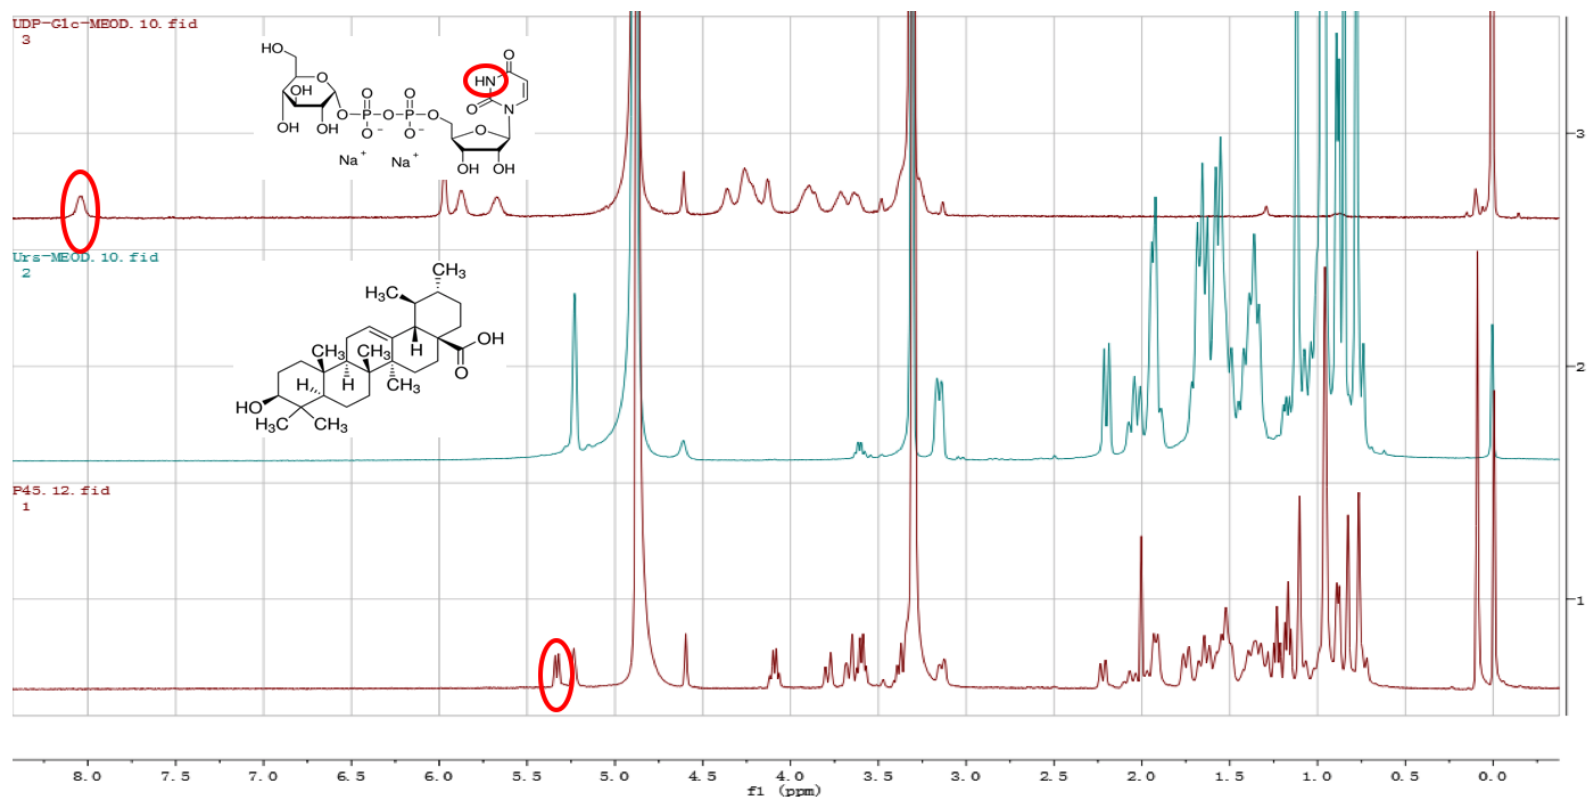

**FIGURE S3** <sup>1</sup>H NMR analysis of UDP-glucose (above), ursolic acid (middle) and enzymatic reaction product (below)

**TABLE S3**  $^{13}\text{C}$ -NMR data for ursolic acid and enzymatic reaction product

| <b>Position of<br/>carboxyl</b> | <b>Ursolic<br/>acid</b> | <b>Reaction<br/>product</b> | <b>Position of<br/>carboxyl</b> | <b>Ursolic<br/>acid</b> | <b>Reaction<br/>product</b> |
|---------------------------------|-------------------------|-----------------------------|---------------------------------|-------------------------|-----------------------------|
| 1                               | 39.0                    | 39.9                        | 19                              | 38.4                    | 39.4                        |
| 2                               | 27.8                    | 28.9                        | 20                              | 38.6                    | 31.3                        |
| 3                               | 78.3                    | 79.3                        | 21                              | 30.4                    | 28.4                        |
| 4                               | 38.6                    | 39.7                        | 22                              | 38.4                    | 37.1                        |
| 5                               | 55.4                    | 56.4                        | 23                              | 22.7                    | 28.4                        |
| 6                               | 20.2                    | 19.1                        | 24                              | 16.4                    | 16.5                        |
| 7                               | 33.0                    | 33.9                        | 25                              | 16.2                    | 15.7                        |
| 8                               | 39.0                    | 40.60                       | 26                              | 18.1                    | 17.5                        |
| 9                               | -                       | -                           | 27                              | 23.9                    | 23.6                        |
| 10                              | 36.7                    | 37.7                        | 28                              | 180.2                   | 177.5                       |
| 11                              | 23.0                    | 24.0                        | 29                              | 20.2                    | 17.2                        |
| 12                              | 125.5                   | 126.8                       | 30                              | 18.1                    | 21.1                        |
| 13                              | 138.2                   | 138.7                       | 1'                              | -                       | 95.3                        |
| 14                              | 41.9                    | 42.9                        | 2'                              | -                       | 73.5                        |
| 15                              | 27.83                   | 28.89                       | 3'                              | -                       | 79.33                       |
| 16                              | 23.94                   | 24.84                       | 4'                              | -                       | 70.81                       |
| 17                              | -                       | -                           | 5'                              | -                       | 78.16                       |
| 18                              | 52.99                   | 53.82                       | 6'                              | -                       | 62.11                       |
